# Supplementary material for: Cobalt complexes tuned by Anderson-type polyoxometalates and bis-amide derivative ligands featuring a ‘V’-like connector for efficient ampere sensing and the visible-light catalytic reduction of Cr(vi)
Source: Royal Society of Chemistry journal article supplement (doi:10.1039/d1dt04341b), 2022-01-01
Supplement: d1dt04341b1.pdf [file d1dt04341b1.pdf]

## Supplementary Information

### Cobalt Complexes Tuned by Anderson-type Polyoxometalates and Bis-amide Derivative Ligands Featured with 'V'-like Connector for Efficient Ampere Sensing and Visible-light Catalytic Reduction for Cr(VI)

Yue Zhang, Xiang Wang, Yue Wang, Na Xu and Xiu-Li Wang\*

*College of Chemistry and Materials Engineering, Professional Technology Innovation Center of Liaoning Province for Conversion Materials of Solar Cell, Bohai University, Jinzhou 121013, P. R. China*

#### Preparation of organic ligands

##### Synthesis of L<sup>1</sup>

Nicotinic acid (4.92 g, 0.04 mmol) and 4,4-diaminodiphenylmethane (3.96 g, 0.02 mmol) were placed a 250 mL three-necked flask containing pyridine (60 mL). After stirring for 30 min, triphenyl phosphate (12.3 g, 0.04 mol) was added slowly, and the mixture was refluxed for 10 hours. After cooling to room temperature, a white precipitate L<sup>1</sup> was obtained. The solid was filtered and washed with ethanol. The structure was determined by <sup>1</sup>H NMR and <sup>13</sup>C NMR analysis (Fig. S2). <sup>1</sup>H NMR (400 MHz, DMSO-*d*<sub>6</sub>) δ 10.80 (s, 2H), 9.14 (d, *J* = 1.3 Hz, 2H), 8.79 (d, *J* = 4.4 Hz, 2H), 8.33 (d, *J* = 8.0 Hz, 2H), 7.99 (d, *J* = 8.6 Hz, 4H), 7.81 (d, *J* = 8.5 Hz, 4H), 7.63–7.57 (m, 2H). <sup>13</sup>C NMR (100 MHz, DMSO-*d*<sub>6</sub>) δ 193.98, 165.02, 152.82, 149.24, 143.19, 136.10, 132.91, 131.28, 130.79, 124.00, 119.91.

##### Synthesis of L<sup>2</sup>

The synthesis process of L<sup>2</sup> was similar to that of L<sup>1</sup>, except 4,4'-diaminodiphenylketone (4.24 g, 0.02 mmol) in place of 4,4-diaminodiphenylmethane as original material. White powder of L<sup>2</sup> were obtained. The structure was determined by <sup>1</sup>H NMR and <sup>13</sup>C NMR analysis (Fig. S2). <sup>1</sup>H NMR (400 MHz, DMSO-*d*<sub>6</sub>) δ 10.42 (s, 1H), 9.09 (d, *J* = 1.0 Hz, 2H), 8.75 (d, *J* = 4.5 Hz, 2H), 8.28 (d, *J* = 8.0 Hz, 2H), 7.69 (d, *J* = 8.3 Hz, 4H), 7.60–7.52 (m, 2H), 7.23 (d, *J* = 8.2 Hz, 4H), 3.91 (s, 2H). <sup>13</sup>C NMR (100 MHz, DMSO-*d*<sub>6</sub>) δ 164.31, 152.49, 149.08, 137.48, 137.28, 135.85,

131.04, 129.31, 123.92, 120.96.

### Cr(VI) reduction calculation

The photocatalysis efficiency of complexes **1–4** for Cr(VI) reduction was calculated by using the standard equation:<sup>1</sup>

$$\text{Cr(VI) reduction efficiency (\%)} = \left[ \frac{A_0 - A_t}{A_0} \right] \times 100 \quad (1)$$

Here,  $A_0$  is the initial solution absorbance, and  $A_t$  is the solution absorbance at reaction time  $t$  (min).

**Table S1** Crystallographic data of complexes **1–4**.

| Complex                                 | <b>1</b>                                                          | <b>2</b>                                                                       | <b>3</b>                                                           | <b>4</b>                                                                       |
|-----------------------------------------|-------------------------------------------------------------------|--------------------------------------------------------------------------------|--------------------------------------------------------------------|--------------------------------------------------------------------------------|
| Empirical formula                       | C <sub>50</sub> H <sub>53</sub> AlCo <sub>2</sub> Mo <sub>6</sub> | C <sub>50</sub> H <sub>58</sub> Co <sub>2</sub> Mo <sub>6</sub> N <sub>8</sub> | C <sub>50</sub> H <sub>68</sub> Al <sub>2</sub> Co <sub>2</sub> Mo | C <sub>50</sub> H <sub>54</sub> Co <sub>2</sub> Mo <sub>6</sub> N <sub>8</sub> |
| Formula weight                          | 1998.48                                                           | 2168.14                                                                        | 3112.12                                                            | 2196.11                                                                        |
| Crystal system                          | Triclinic                                                         | Triclinic                                                                      | Triclinic                                                          | Triclinic                                                                      |
| Space group                             | <i>P</i> Error!                                                   | <i>P</i> Error!                                                                | <i>P</i> Error!                                                    | <i>P</i> Error!                                                                |
| a (Å)                                   | 6.8930(5)                                                         | 8.9146(11)                                                                     | 12.4682(5)                                                         | 8.7713(19)                                                                     |
| b (Å)                                   | 11.8860(10)                                                       | 10.3622(13)                                                                    | 12.4968(5)                                                         | 10.978(3)                                                                      |
| c (Å)                                   | 19.7450(16)                                                       | 18.449(2)                                                                      | 14.3152(6)                                                         | 18.101(4)                                                                      |
| α (°)                                   | 106.693(2)                                                        | 87.576(3)                                                                      | 81.7570(10)                                                        | 81.880(4)                                                                      |
| β (°)                                   | 90.862(2)                                                         | 86.380(3)                                                                      | 80.9080(10)                                                        | 83.858(4)                                                                      |
| γ (°)                                   | 99.792(2)                                                         | 78.615(3)                                                                      | 75.0090(10)                                                        | 75.321(4)                                                                      |
| V (Å <sup>3</sup> )                     | 1523.5(2)                                                         | 1666.5(4)                                                                      | 2115.19(15)                                                        | 1664.6(6)                                                                      |
| Z                                       | 1                                                                 | 1                                                                              | 1                                                                  | 1                                                                              |
| Dc (g cm <sup>-3</sup> )                | 2.178                                                             | 2.160                                                                          | 2.434                                                              | 2.191                                                                          |
| μ (mm <sup>-1</sup> )                   | 1.841                                                             | 2.107                                                                          | 2.236                                                              | 2.113                                                                          |
| F (000)                                 | 984                                                               | 1060                                                                           | 1500                                                               | 1072                                                                           |
| Reflection collected                    | 10071                                                             | 12408                                                                          | 15697                                                              | 9133                                                                           |
| Unique reflections                      | 6438                                                              | 8272                                                                           | 10429                                                              | 5876                                                                           |
| parameters                              | 466                                                               | 476                                                                            | 633                                                                | 479                                                                            |
| R <sub>int</sub>                        | 0.0438                                                            | 0.0671                                                                         | 0.0235                                                             | 0.0476                                                                         |
| GOF                                     | 1.019                                                             | 0.920                                                                          | 1.008                                                              | 0.936                                                                          |
| R <sub>I</sub> <sup>a</sup> [I ≥ α(I)]  | 0.0557                                                            | 0.0617                                                                         | 0.0356                                                             | 0.0452                                                                         |
| wR <sub>2</sub> <sup>b</sup> (all date) | 0.1486                                                            | 0.1738                                                                         | 0.0828                                                             | 0.1066                                                                         |

$$^a R_I = \sum ||F_o| - |F_c|| / \sum |F_o|; \quad ^b wR_2 = \sqrt{\sum [w(F_o^2 - F_c^2)^2] / \sum [w(F_o^2)^2]}^{1/2}$$

**Table S2.** Selected bond distances (Å) and angles (°) of complexes **1–4**.

### Complex 1

|                     |          |                     |          |
|---------------------|----------|---------------------|----------|
| Co(1)-O(3)#2        | 2.152(6) | Co(1)-O(4)#2        | 2.159(5) |
| Co(1)-O(1)          | 2.129(5) | Co(1)-N(1)          | 2.083(7) |
| Co(1)-O(2)#1        | 2.208(6) | Co(1)-N(2)#3        | 2.124(7) |
| O(3)#2-Co(1)-O(2)#1 | 85.9(2)  | N(1)-Co(1)-O(2)#1   | 179.7(3) |
| O(3)#2-Co(1)-O(4)#2 | 89.3(2)  | N(1)-Co(1)-O(4)#2   | 90.0(2)  |
| O(1)-Co(1)-O(3)#2   | 86.8(2)  | N(1)-Co(1)-N(2)#3   | 95.2(3)  |
| O(1)-Co(1)-O(2)#1   | 90.6(2)  | N(2)#3-Co(1)-O(3)#2 | 168.0(3) |
| O(1)-Co(1)-O(4)#2   | 176.1(2) | N(2)#3-Co(1)-O(1)   | 85.4(3)  |
| O(4)#2-Co(1)-O(2)#1 | 89.7(2)  | N(2)#3-Co(1)-O(2)#1 | 85.1(3)  |
| N(1)-Co(1)-O(3)#2   | 93.9(3)  | N(2)#3-Co(1)-O(4)#2 | 98.5(2)  |
| N(1)-Co(1)-O(1)     | 89.7(2)  |                     |          |

Symmetry codes for **1**: #1 -x, -y+1, -z #2 x+1, y, z #3 -x, -y, -z+1 #4 x-1, y, z

### Complex 2

|                  |          |                   |           |
|------------------|----------|-------------------|-----------|
| Co(1)-O(4)       | 2.062(7) | Co(1)-N(1)        | 2.135(11) |
| Co(1)-O(7)       | 2.100(7) | Co(1)-O(3W)       | 2.026(8)  |
| Co(1)-O(2W)      | 2.084(7) | Co(1)-O(1W)       | 2.121(9)  |
| O(4)-Co(1)-O(7)  | 90.2(3)  | O(2W)-Co(1)-O(1W) | 88.4(3)   |
| O(4)-Co(1)-O(2W) | 173.5(3) | O(3W)-Co(1)-O(4)  | 92.4(3)   |
| O(4)-Co(1)-N(1)  | 91.5(3)  | O(3W)-Co(1)-O(7)  | 177.1(3)  |
| O(4)-Co(1)-O(1W) | 89.9(3)  | O(3W)-Co(1)-O(2W) | 93.9(3)   |
| O(7)-Co(1)-N(1)  | 91.5(3)  | O(3W)-Co(1)-N(1)  | 89.8(4)   |
| O(7)-Co(1)-O(1W) | 87.5(3)  | O(3W)-Co(1)-O(1W) | 91.1(4)   |
| O(2W)-Co(1)-O(7) | 83.5(3)  | O(1W)-Co(1)-N(1)  | 178.3(4)  |
| O(2W)-Co(1)-N(1) | 90.1(3)  |                   |           |

Symmetry codes for **2**: #1 -x+2, -y+2, -z

### Complex 3

|                     |             |                    |            |
|---------------------|-------------|--------------------|------------|
| Co(1)-O(1W)         | 2.072(3)    | Co(1)-O(2W)        | 2.050(3)   |
| Co(1)-O(2)#1        | 2.107(3)    | Co(1)-O(3)#2       | 2.113(3)   |
| Co(1)-O(1)          | 2.053(3)    | Co(1)-N(1)         | 2.088(4)   |
| O(1W)-Co(1)-O(2)#1  | 89.99(11)   | O(2W)-Co(1)-O(1W)  | 88.95(13)  |
| O(1W)-Co(1)-O(3)#2  | 92.20(11)   | O(2W)-Co(1)-O(2)#1 | 90.39(12)  |
| O(1W)-Co(1)-N(1)    | 175.58 (13) | O(2W)-Co(1)-O(1)   | 175.29(13) |
| O(2)#1-Co(1)-O(3)#2 | 177.06(12)  | O(2W)-Co(1)-O(3)#2 | 91.61(12)  |
| O(1)-Co(1)-O(1W)    | 86.99(12)   | O(2W)-Co(1)-N(1)   | 95.47(14)  |
| O(1)-Co(1)-O(2)#1   | 92.00(11)   | N(1)-Co(1)-O(2)#1  | 89.88(13)  |
| O(1)-Co(1)-O(3)#2   | 86.16(11)   | N(1)-Co(1)-O(3)#2  | 87.79(12)  |
| O(1)-Co(1)-N(1)     | 88.60(13)   |                    |            |

Symmetry codes for **3**: #1 -x, -y, -z+1 #2 -x, -y+1, -z+1

### Complex 4

|            |          |             |          |
|------------|----------|-------------|----------|
| Co(1)-O(1) | 2.103(5) | Co(1)-O(1W) | 2.122(6) |
| Co(1)-O(2) | 2.088(6) | Co(1)-O(3W) | 2.092(7) |

|                  |          |                   |          |
|------------------|----------|-------------------|----------|
| Co(1)-O(2W)      | 2.022(6) | Co(1)-N(1)        | 2.114(7) |
| O(1)-Co(1)-O(1W) | 89.7(3)  | O(2W)-Co(1)-O(1W) | 90.5(3)  |
| O(1)-Co(1)-N(1)  | 91.1(3)  | O(2W)-Co(1)-O(3W) | 98.8(3)  |
| O(2)-Co(1)-O(1)  | 88.3(2)  | O(2W)-Co(1)-N(1)  | 88.9(3)  |
| O(2)-Co(1)-O(1W) | 91.3(3)  | O(3W)-Co(1)-O(1)  | 82.8(2)  |
| O(2)-Co(1)-O(3W) | 171.0(2) | O(3W)-Co(1)-O(1W) | 90.4(3)  |
| O(2)-Co(1)-N(1)  | 92.4(3)  | O(3W)-Co(1)-N(1)  | 86.0(3)  |
| O(2W)-Co(1)-O(1) | 178.3(3) | N(1)-Co(1)-O(1W)  | 176.3(3) |
| O(2W)-Co(1)-O(2) | 90.0(3)  |                   |          |

Symmetry codes for **4**: #1 -x+2, -y+2, -z

**Table S3** Selected hydrogen bonding geometry (Å, °) for complexes **1–4**.

| Complex  | D–H···A        | D–H / Å | H···A / Å | D···A / Å | D–H···A / ° |
|----------|----------------|---------|-----------|-----------|-------------|
| <b>1</b> | N4–H4···O12    | 0.86    | 2.31      | 3.1241    | 158         |
|          | O2W–H2WB···O6  | 0.85    | 2.03      | 2.8272    | 155         |
| <b>2</b> | N4–H4···O5     | 0.86    | 1.88      | 2.7398    | 176         |
|          | O2W–H2WB···O15 | 0.85    | 2.14      | 2.9003    | 149         |
| <b>3</b> | O2W–H2WB···O15 | 0.85    | 2.14      | 2.9003    | 149         |
|          | O2W–H2WA···O3  | 0.85    | 1.81      | 2.5876    | 152         |
| <b>4</b> | O2W–H2WA···O3  | 0.85    | 1.81      | 2.5876    | 152         |
|          | N4–H4···O15    | 0.86    | 2.19      | 3.0456    | 171         |

**Table S4** Crystal states of complexes **1–4** in different solvents and composition.

| Complex  | Solvent type                                       | Solvent composition | Magnification information | Crystalline state                                                                     |
|----------|----------------------------------------------------|---------------------|---------------------------|---------------------------------------------------------------------------------------|
| <b>1</b> | H <sub>2</sub> O: DMF                              | 3:3                 | 4.5*10                    | 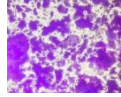 |
|          | H <sub>2</sub> O: DMA                              | 3:3                 | 4.5*10                    |  |
|          | H <sub>2</sub> O: CH <sub>3</sub> OH               | 3:3                 | 4.5*10                    |  |
|          | H <sub>2</sub> O: C <sub>2</sub> H <sub>5</sub> OH | 3:3                 | 4.5*10                    |  |
|          | H <sub>2</sub> O: C <sub>2</sub> H <sub>5</sub> OH | 3:5                 | 4.0*10                    |  |

|          |                                                    |     |        |                                                                                     |
|----------|----------------------------------------------------|-----|--------|-------------------------------------------------------------------------------------|
|          | H <sub>2</sub> O: C <sub>2</sub> H <sub>5</sub> OH | 2:6 | 4.0*10 | 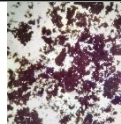 |
|          | H <sub>2</sub> O: C <sub>2</sub> H <sub>5</sub> OH | 5:3 | 4.0*10 |  |
|          | H <sub>2</sub> O: C <sub>2</sub> H <sub>5</sub> OH | 6:2 | 4.5*10 |  |
| <b>2</b> | H <sub>2</sub> O: C <sub>2</sub> H <sub>5</sub> OH | 4:1 | 4.5*10 |  |
| <b>3</b> | H <sub>2</sub> O: C <sub>2</sub> H <sub>5</sub> OH | 4:6 | 4.5*10 |  |
| <b>4</b> | H <sub>2</sub> O: C <sub>2</sub> H <sub>5</sub> OH | 6:4 | 4.5*10 |  |

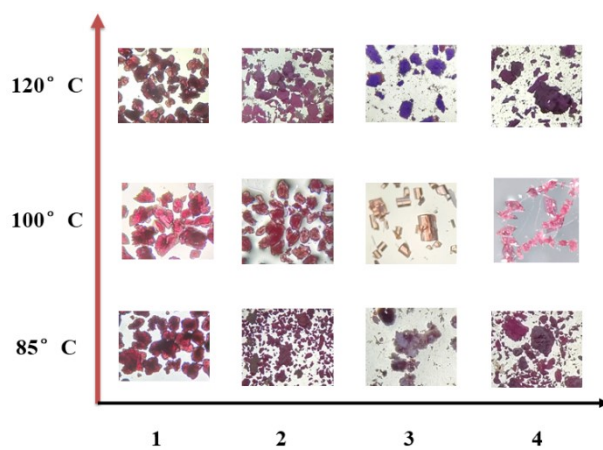

**Fig. S1.** Crystallization diagram of complexes 1–4 at different temperatures (Magnification information: 4.5\*10).

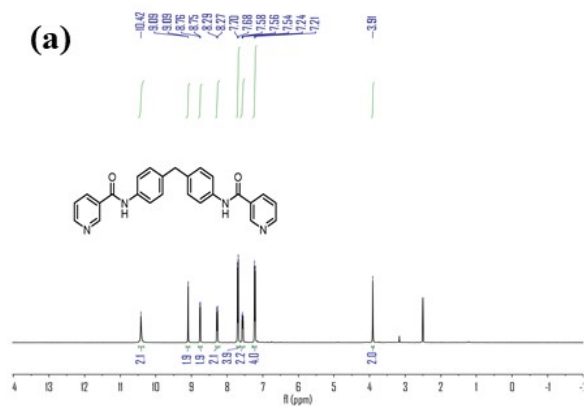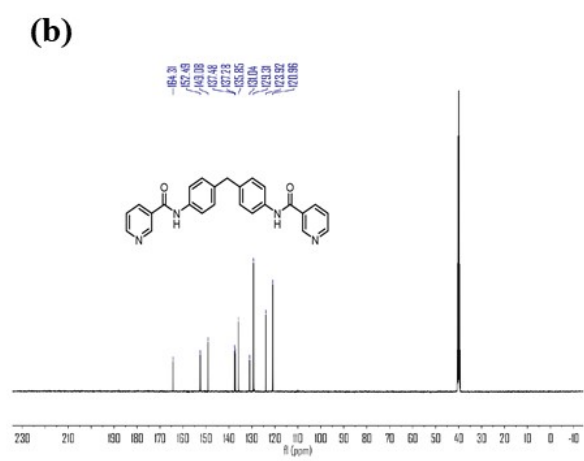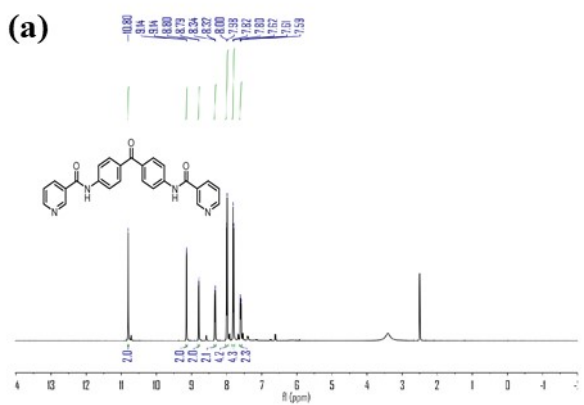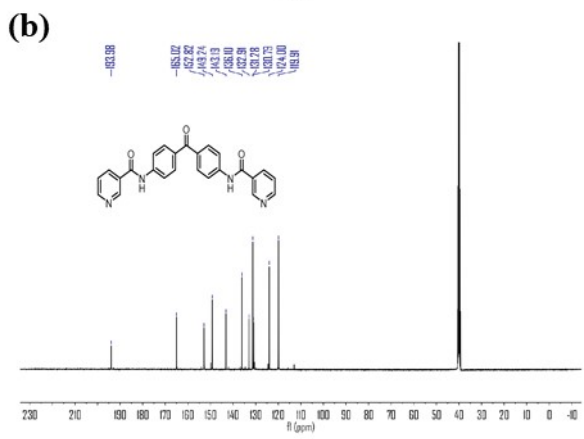

Fig. S2. <sup>1</sup>H and <sup>13</sup>C NMR spectra of L<sup>1</sup> and L<sup>2</sup> in DMSO-*d*<sub>6</sub>.

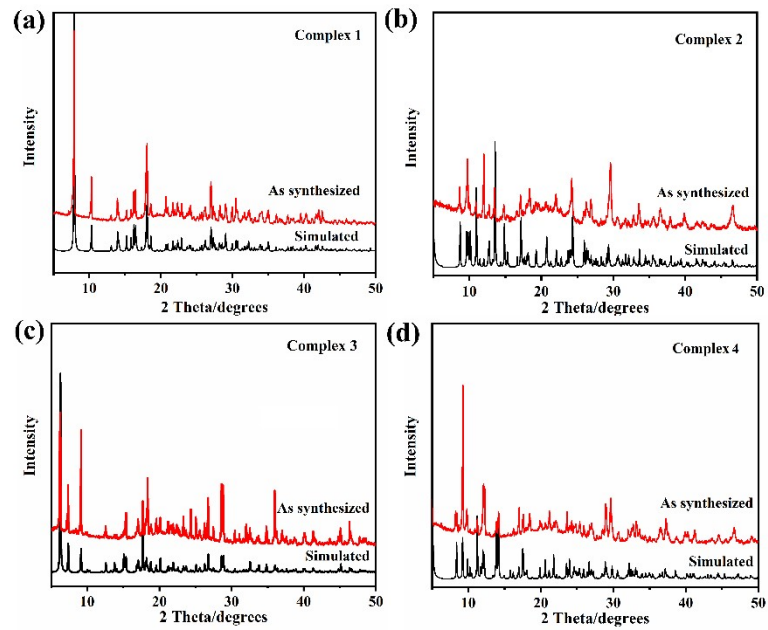

Fig. S3. The PXRD patterns of complexes 1-4.

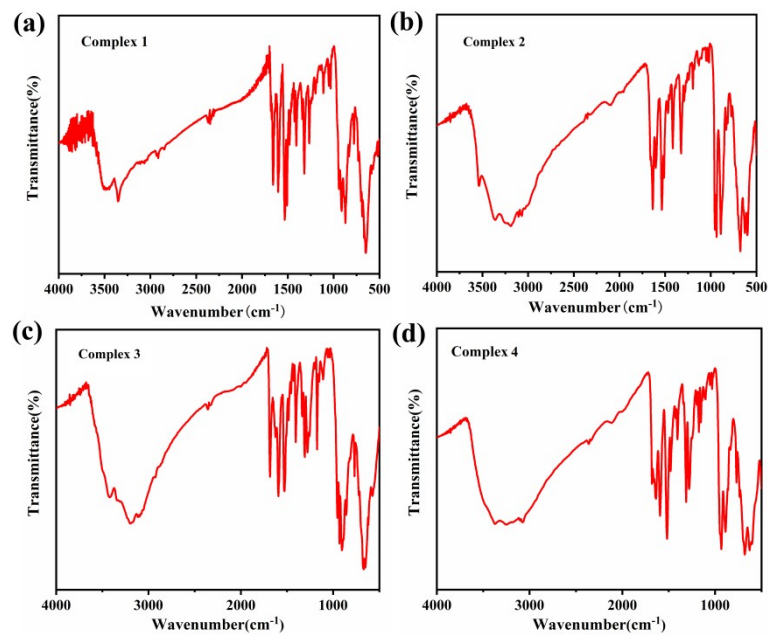

Fig. S4. The IR spectra of complexes 1-4.

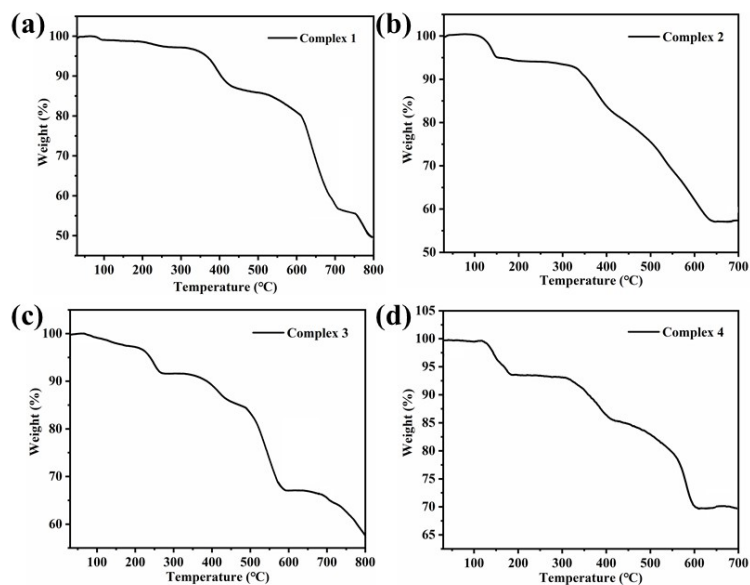

**Fig. S5.** The TG curves of complexes 1–4.

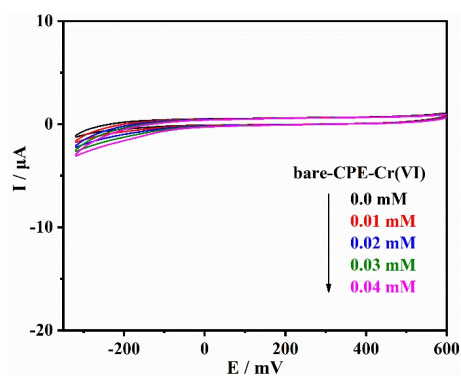

**Fig. S6.** The CV curves of bare-CPE in electrolyte solution containing Cr(VI) ions (scan rate:  $60 \text{ mV s}^{-1}$ ).

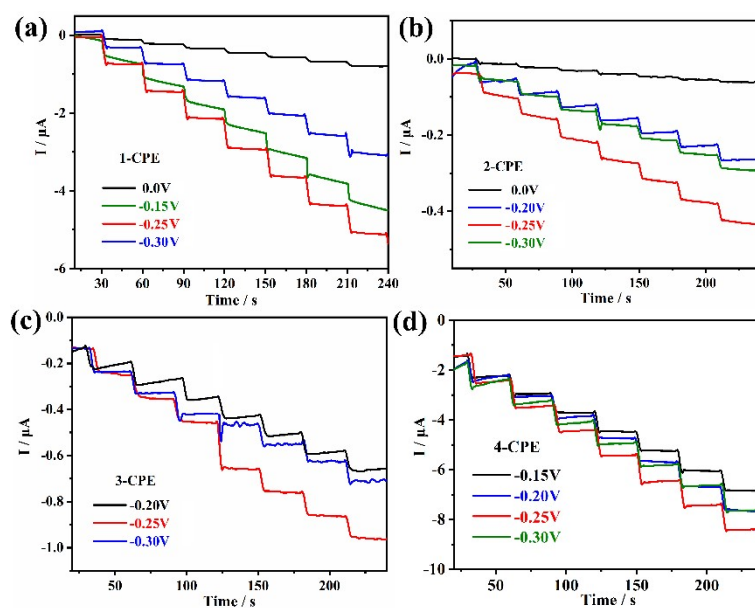

**Fig. S7.** The best potential of amperometric detection of Cr(VI) ions for 1–4-CPEs.



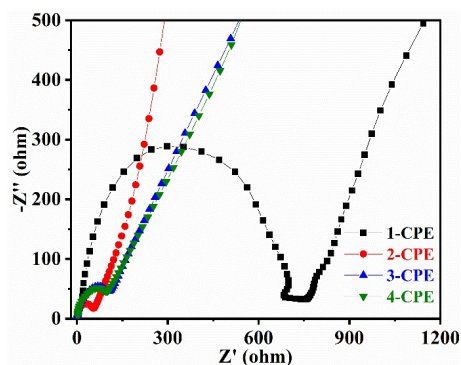

Fig. S8. Nyquist plots of 1–4–CPEs.

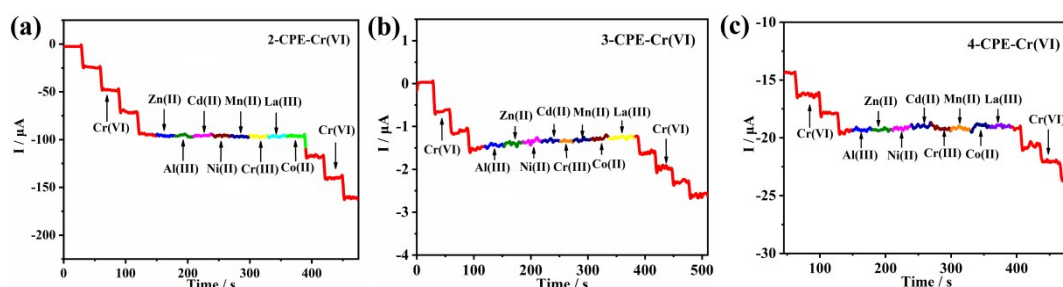

Fig. S9. Current response of 2–4–CPEs contains Cr (VI) ions with continuous addition of various metal ions (ions: 250  $\mu\text{M}$   $\text{Cr}^{3+}$ ,  $\text{Al}^{3+}$ ,  $\text{Cd}^{2+}$ ,  $\text{La}^{3+}$ ,  $\text{Ba}^{2+}$ ,  $\text{Co}^{2+}$ ,  $\text{Ni}^{2+}$ ,  $\text{Zn}^{2+}$ ).

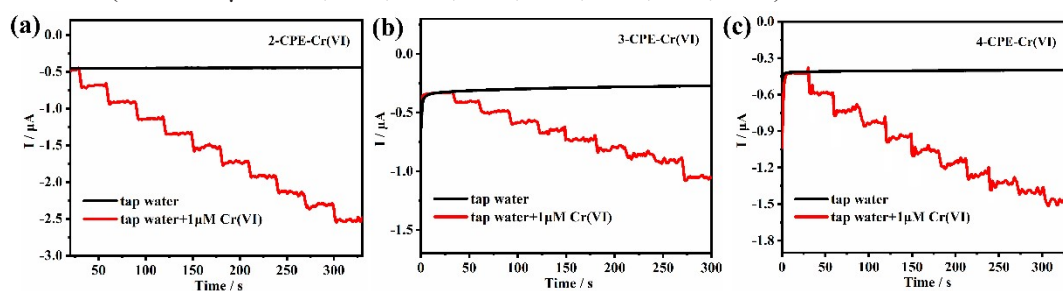

Fig. S10. Current response of 2–4–CPEs to detect trace Cr(VI) ions in tap water samples.

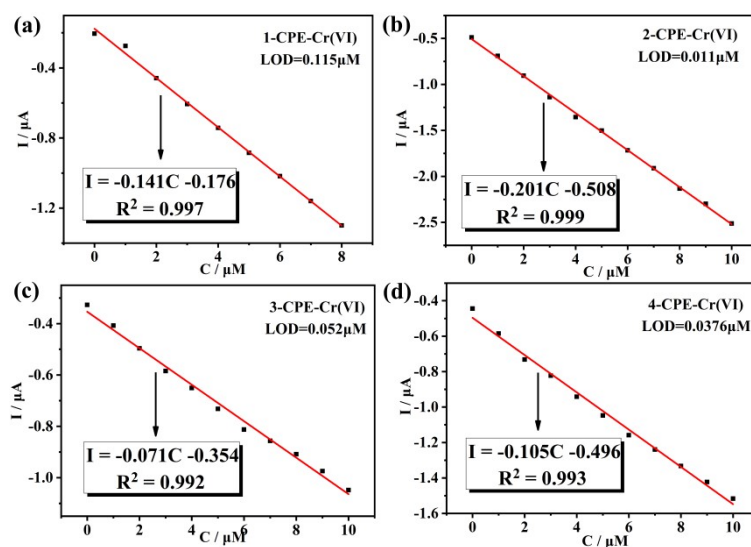

Fig. S11. Linear relationship between concentrations of Cr(VI) ions in real lake water sample and redox peak currents of 1–4–CPEs.

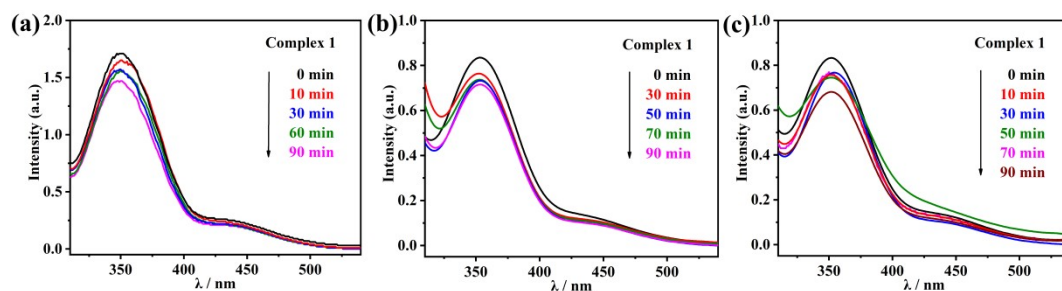

**Fig. S12.** Photocatalytic reduction of Cr(VI) ions: (a) without CH<sub>3</sub>OH (b) without light (c) without catalyst.

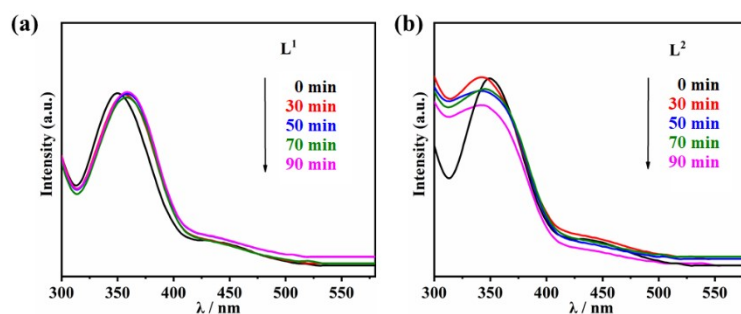

**Fig. S13.** Photocatalytic reduction of Cr(VI) with (a) L<sup>1</sup> and (b) L<sup>2</sup> as the catalysts under different irradiation times.

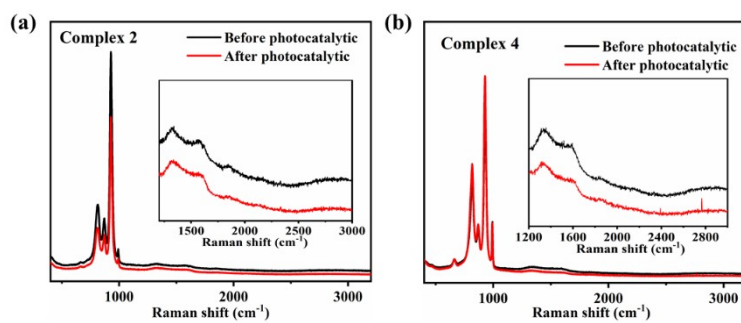

**Fig. S14.** Raman spectra of complexes 2 and 4.

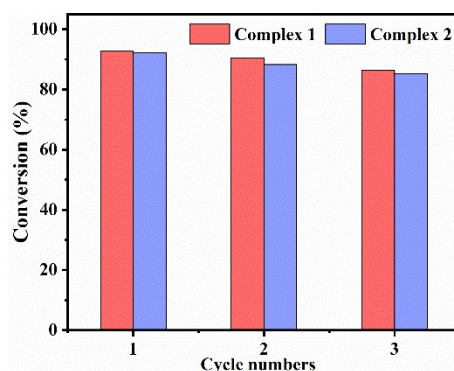

**Fig. S15.** Three cycle experiments of photocatalytic reduction of Cr(VI) ions solution with complexes 1–2 as catalyst.

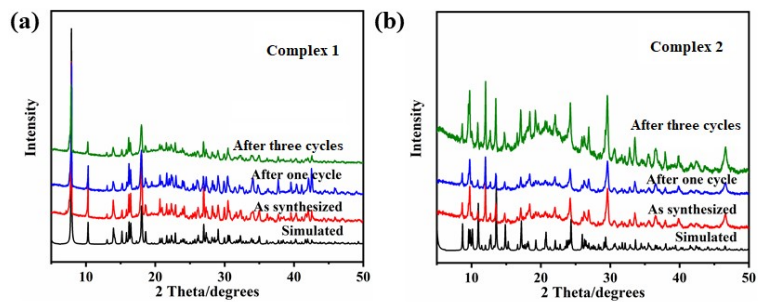

**Fig. S16.** The PXRD patterns of complexes 1–2 after photocatalysis.

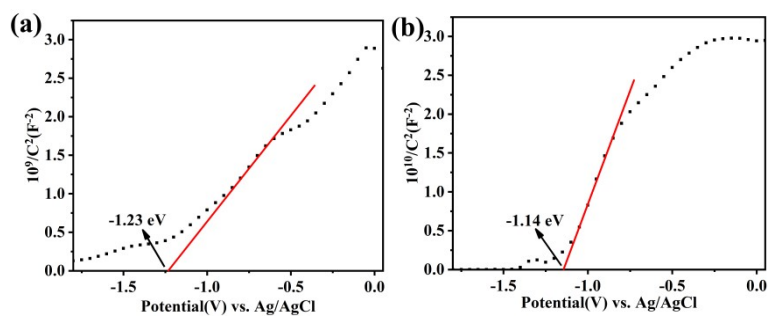

**Fig. S17.** Mott–Schottky plots in 0.1 M Na<sub>2</sub>SO<sub>4</sub> aqueous solution at frequencies of 1000 Hz (a) Complex 1 (b) Complex 2.

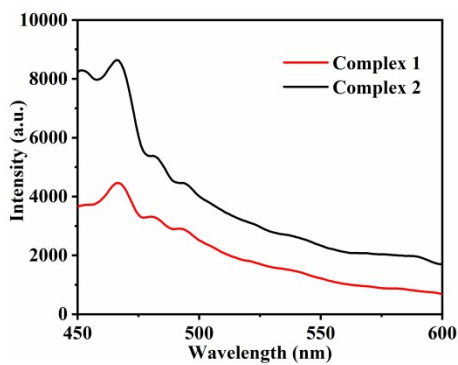

**Fig. S18.** Solid-state emission spectra of complexes 1–2 at room temperature.

1. X. R. Tian, Y. Q. Zhang, Y. Y. Ma, Q. Zhao, Z. G. Han, *Catal. Sci. Technol.*, 2020, **10**, 2593-2601.
